# Supplementary material for: Comparison of Functional Outcomes after Anterior Cruciate Ligament Reconstruction with Meniscal Repair for Unstable versus Stable Meniscal Tears
Source: MDPI journal article supplement (doi:10.3390/diagnostics14090871), 2024-04-23
Supplement: s1 [file s1]

# Rehabilitation Protocol

## Phase 1: Immediately Postoperatively to Week 6

| Condition                 | Stable                                                                                                                                                                                                                                                                                                                                                                                                                                                                                                                                                                                                      | Unstable                                                                                                                                                       |
|---------------------------|-------------------------------------------------------------------------------------------------------------------------------------------------------------------------------------------------------------------------------------------------------------------------------------------------------------------------------------------------------------------------------------------------------------------------------------------------------------------------------------------------------------------------------------------------------------------------------------------------------------|----------------------------------------------------------------------------------------------------------------------------------------------------------------|
| Precautions               | <ul style="list-style-type: none"> <li>-PWB 0-2 weeks</li> <li>-Tolerable WB at 2-6 weeks</li> <li>-ROM 0°~90° at 2 weeks</li> <li>-Isometric OKC at 3 weeks~</li> </ul>                                                                                                                                                                                                                                                                                                                                                                                                                                    | <ul style="list-style-type: none"> <li>-NWB</li> <li>-ROM 0°~90° at 4 weeks</li> <li>-Isometric OKC at 3~7 week</li> <li>-No OKC hamstring exercise</li> </ul> |
| Goals/Criteria to Advance | <ul style="list-style-type: none"> <li>-Pain control</li> <li>-Reducing swelling</li> <li>-Recovering ROM</li> <li>-Normalizing gait</li> <li>-ROM symmetrical</li> <li>-Normal joint temperature</li> <li>-Minimal to no joint effusion</li> <li>*Unstable: adjusted ROM and WB timelines</li> </ul>                                                                                                                                                                                                                                                                                                       |                                                                                                                                                                |
| Exercises                 | <ul style="list-style-type: none"> <li>-Patella mobilization</li> <li>-Quad sets</li> <li>-Self ROM (wall slides, heel slides, heel prop extension overpressure)</li> <li>-Ankle pumps</li> <li>-Straight leg raises with NMES</li> <li>-Terminal knee extension (OKC, consider NMES)</li> <li>-Calf/hamstring stretching</li> <li>-4-direction (flexion, extension, adduction, abduction) leg strengthening in full extension with elastic band</li> <li>-Sitting knee extension (isometric -&gt; band exercise, starting at 4 weeks)</li> <li>*Unstable: adapted for NWB and delayed timelines</li> </ul> |                                                                                                                                                                |

---

*Abbreviation: PWB, partial weight bearing; NWB, non-weight bearing; ROM, range of motion; OKC, open kinetic chain; NMES, neuromuscular electrical stimulation.*

## Phase 2: Postoperatively Weeks 6 to 12

| Condition                 | Stable                                                                                                                                                                                                                                                                                                                                                                                                                                                                                                                                                                                                                                                                                                                                                                       | Unstable                                                                                                                                                                                                                                                     |
|---------------------------|------------------------------------------------------------------------------------------------------------------------------------------------------------------------------------------------------------------------------------------------------------------------------------------------------------------------------------------------------------------------------------------------------------------------------------------------------------------------------------------------------------------------------------------------------------------------------------------------------------------------------------------------------------------------------------------------------------------------------------------------------------------------------|--------------------------------------------------------------------------------------------------------------------------------------------------------------------------------------------------------------------------------------------------------------|
| Precautions               | <ul style="list-style-type: none"> <li>-FWB at 6 weeks</li> <li>-Full ROM at 6 weeks</li> <li>-CKC 90° at 10 weeks</li> </ul>                                                                                                                                                                                                                                                                                                                                                                                                                                                                                                                                                                                                                                                | <ul style="list-style-type: none"> <li>-Tolerable WB at 6-8 weeks</li> <li>-FWB at 8 weeks</li> <li>-Full ROM at 8 weeks</li> <li>-OKC at 6 weeks (hamstring at 10 weeks)</li> <li>-CKC 60° at 8~16 weeks</li> <li>-Single-leg balance at 8 weeks</li> </ul> |
| Goals/Criteria to Advance | <ul style="list-style-type: none"> <li>-Muscle strengthening &amp; proprioception training</li> <li>-Achieve full WB</li> <li>-Normalize gait pattern on flat ground</li> <li>-Maintain trace to no joint effusion</li> </ul>                                                                                                                                                                                                                                                                                                                                                                                                                                                                                                                                                |                                                                                                                                                                                                                                                              |
| Exercises                 | <ul style="list-style-type: none"> <li>-Progressive ROM</li> <li>-PWB to FWB gait training with and without crutches and brace</li> <li>-Calf/Hamstring stretching and strengthening</li> <li>-Weight shifting and bearing (single-leg balance)</li> <li>-Isometric wall squat (limited ROM)</li> <li>-Leg press (limited ROM, tolerable)</li> <li>-Progressive balance training (stable to unstable surface/both to single)</li> <li>-Hip strengthening (clam shell, hip bridge, hip abduction and etc.)</li> <li>-Core training (planks, dead bugs and etc.)</li> <li>-Stationary biking, CKC training (squat, lunge, leg press, step ups/downs, bridges and etc.)</li> <li>-OKC training (leg extension/curl, with elastic band to machine leg extension/curl)</li> </ul> |                                                                                                                                                                                                                                                              |

*Abbreviation: FWB, full weight bearing; PWB, partial weight bearing; WB, weight bearing; ROM, range of motion; OKC, open kinetic chain; CKC, closed kinetic chain; NMES, neuromuscular electrical stimulation*

*\*Exercise parameters: 3sets, 15 to 25 repetitions, 30 to 60 second rest periods, 3 to 4 times per week*

### Phase 3: Postoperatively Weeks 13 to 24

| Condition                 | Stable                                                                                                                                                                                                                                                                                                                                                   | Unstable                                     |
|---------------------------|----------------------------------------------------------------------------------------------------------------------------------------------------------------------------------------------------------------------------------------------------------------------------------------------------------------------------------------------------------|----------------------------------------------|
| Precautions               | -Running at 16 weeks                                                                                                                                                                                                                                                                                                                                     | -CKC 90° at 16 weeks<br>-Running at 20 weeks |
| Goals/Criteria to Advance | -Enhance muscle strength<br>-Proprioception, and neuromuscular control (plyometric and agility)<br>-Achieve 90% LSI scores (isokinetic test)<br>-Symmetric balance scores<br>-85% Single-leg hop scores                                                                                                                                                  |                                              |
| Exercises                 | -Transition Gym-based program and/or supervised training<br>-Cardiovascular training (biking and running)<br>-Advance motor control training<br>-High intensity and plyometric training<br>-Progressive motor control training<br>-Progressive running training (distance)<br>-Agility training (side steps, ladder drills, one or double jump and etc.) |                                              |

---

*Abbreviation: CKC, closed kinetic chain; LSI, limb symmetry index.*

*\*Exercise parameters: 3sets, 8 to 12 repetitions, 2-to-3-minute rest periods, 3 times per week*

## Phase 4: Postoperatively Weeks 24+

| Condition                 | Stable                                                                                                                                                                                                                                                                                                                     | Unstable                           |
|---------------------------|----------------------------------------------------------------------------------------------------------------------------------------------------------------------------------------------------------------------------------------------------------------------------------------------------------------------------|------------------------------------|
| Precautions               | -Specific RTS training at 24 weeks                                                                                                                                                                                                                                                                                         | -Specific RTS training at 36 weeks |
| Goals/Criteria to Advance | -Sport-specific technical training<br>-90% LSI scores<br>-Symmetric balance scores<br>-90% Single-leg hop scores                                                                                                                                                                                                           |                                    |
| Exercises                 | -High intensity power and maximal effort strength training<br>-Progressive agilities and motor control training<br>-Specific training for individualized to sport/position<br>-Regular evaluations of strength, postural stability, and functional performance (at 9 and 12 months)<br>-Education for secondary prevention |                                    |

---

*Abbreviation: RTS, return to sports; LSI, limb symmetry index.*

*\*Single-leg hop: Single hop distance, Side hop*
